# Exploring Default Mode and Information Flow on the Web

Mizuki Oka<sup>1\*</sup>, Takashi Ikegami<sup>2</sup>

**1** Center for Knowledge Structuring, The University of Tokyo, Hongo, Tokyo, Japan, **2** Graduate School of Arts and Sciences, The University of Tokyo, Komaba, Tokyo, Japan

## Abstract

Social networking services (e.g., Twitter, Facebook) are now major sources of World Wide Web (called “Web”) dynamics, together with Web search services (e.g., Google). These two types of Web services mutually influence each other but generate different dynamics. In this paper, we distinguish two modes of Web dynamics: the *reactive mode* and the *default mode*. It is assumed that Twitter messages (called “tweets”) and Google search queries react to significant social movements and events, but they also demonstrate signs of becoming self-activated, thereby forming a baseline Web activity. We define the former as the reactive mode and the latter as the default mode of the Web. In this paper, we investigate these reactive and default modes of the Web’s dynamics using transfer entropy (TE). The amount of information transferred between a time series of 1,000 frequent keywords in Twitter and the same keywords in Google queries is investigated across an 11-month time period. Study of the information flow on Google and Twitter revealed that information is generally transferred from Twitter to Google, indicating that Twitter time series have some preceding information about Google time series. We also studied the information flow among different Twitter keywords time series by taking keywords as nodes and flow directions as edges of a network. An analysis of this network revealed that frequent keywords tend to become an information source and infrequent keywords tend to become sink for other keywords. Based on these findings, we hypothesize that frequent keywords form the Web’s default mode, which becomes an information source for infrequent keywords that generally form the Web’s reactive mode. We also found that the Web consists of different time resolutions with respect to TE among Twitter keywords, which will be another focal point of this paper.

**Citation:** Oka M, Ikegami T (2013) Exploring Default Mode and Information Flow on the Web. PLoS ONE 8(4): e60398. doi:10.1371/journal.pone.0060398

**Editor:** Yamir Moreno, University of Zaragoza, Spain

**Received:** October 4, 2012; **Accepted:** February 27, 2013; **Published:** April 24, 2013

**Copyright:** © 2013 Oka, Ikegami. This is an open-access article distributed under the terms of the Creative Commons Attribution License, which permits unrestricted use, distribution, and reproduction in any medium, provided the original author and source are credited.

**Funding:** This work was supported by the Japan Society for the Promotion of Science Grant-in-Aid for Young Scientists (B) (#23700106 “Research and Development of a space design supporting tool using Web information”) and by Grant-in-Aid for Scientific Research on Innovative Areas (#24120704 “The study on the neural dynamics for understanding communication in terms of complex hetero systems”). The funders had no role in study design, data collection and analysis, decision to publish, or preparation of the manuscript.

**Competing Interests:** The authors have declared that no competing interests exist.

\* E-mail: mizuki@cks.u-tokyo.ac.jp

## Introduction

Approximately 90% of the World Wide Web’s (hereafter referred to as “Web”) data stream is said to have been created within the last few years [1], and the total amount of data is increasing every day. It is also said that Web data volumes are doubling every two years. This exceptional growth is mainly due to emerging social network services (SNSs), such as Twitter and Facebook. The advantage of SNSs became widely recognized after the Egyptian revolution of February 11, 2011 and the earthquake of March 11, 2011 in Tohoku, Japan. Facebook helped bring worldwide attention to the historical event in Egypt, and Twitter served as an efficient platform for communicating and obtaining information regarding the earthquake. This shift in the Web from search to communication over the last 10 years has been remarkable. People are using the Web to see what other people are doing and to share feelings and ideas.

The two types of Web services, represented here by Google and Twitter respectively, constitute the majority of the information being diffused and circulated on the Web. Google and Twitter have different memory structures. For example, only 126 out of the 3,479 unique trending topics (3.6%) from Twitter exist in the 4,597 unique hot keywords of Google [2]. These keywords are

mostly associated with real-world events, celebrities, and movies. On average, 95% of the hot keywords per day are new in Google, while only 72% of the hot keywords are new in Twitter [2]. This feature is worth noting, since it reflects that retweets, replies, and mentions are prevalent in Twitter; however, such interaction among users is not possible with Google searches. Retweet is a unique feature in Twitter called retweeting (RT), whereby people repost their favorite messages (called “tweets”) on their timelines. Statistics show that half of the RT occurs within an hour and 75% in less than a day [2]. However, approximately 10% of the retweets occur a month later. This implicit cooperative feature of Twitter makes Twitter’s time series different from Google’s time series and as the data show, because of this, the same trending topics persist over a relatively longer period of time in Twitter.

In order to investigate these differences between Google and Twitter, we examined how these two services affect each other. How are their time series different from each other? Does information flow from Twitter to Google or vice versa? We conducted an intensive time series analysis to answer these questions, and to better characterize Web dynamics with respect to Google and Twitter. In this paper, we distinguish between two modes of Web dynamics: one is *reactive mode* and the other is *default mode*. There are examples in which Twitter and Google react

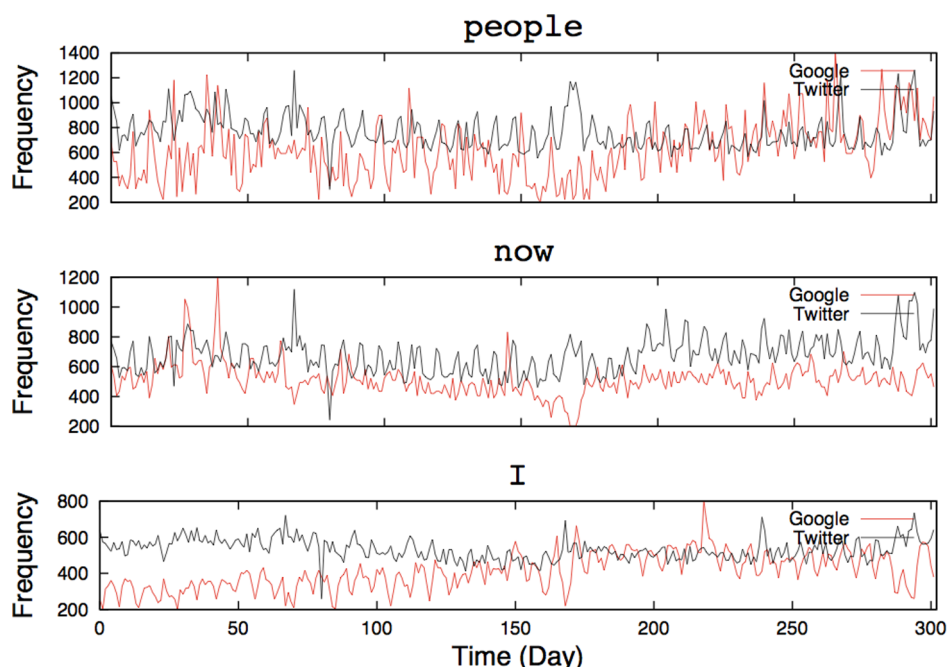

**Figure 1. Examples of frequent keywords in Twitter keywords and Google queries.** Burst behaviors are not salient and synchronization between the two time series was not observed.  
doi:10.1371/journal.pone.0060398.g001

strongly to social movements by producing *bursting* behaviors. This is what we call the Web's *reactive mode*. For example, a burst in the popularity of keywords such as “earthquake” or “nuclear plant” was observed on and after the earthquake of March 11, 2011 in Japan.

The Web also demonstrates aperiodic non-stationary temporal dynamics without necessarily showing bursting behavior, forming a baseline Web activity. We define this baseline activity as the Web's *default mode*. People's tweets may or may not be affected by other users' tweets appearing in their *timelines*, which shows the list of tweets from users they are following. Thus, although global information is not explicitly shared to cooperatively generate tweets that include the same keywords, these tweets may reflect a weak correlation by circulating within Twitter through users' timelines. This reminds us of the classic network theory called *weak ties* [3]. The potential for organizing informational structures and patterning through weak ties is nicely realized by the interactions mediated by timelines. We argue that Twitter as a weak tie generates a *default mode* in Web dynamics. The default mode can be an important Web mode, not only for supporting baseline activity but also for reducing uncertainty in information circulation on the Web, thereby regulating the consistency of information between the Web and the actual world.

For the purpose of revealing and characterizing the Web's default mode, we computed the transfer entropy (TE) between the time series of Twitter keywords and Google queries as well as the information transfer within keywords. TE is one of the information entropy measurements for estimating how the uncertainty of a time series is reduced by using either its preceding states or other time series [4]. TE cannot measure the causal effect but can provide a predictive measure, as discussed in [5,6]. We hope that this study provides useful information for understanding other complex adaptive and autonomous systems, such as brain systems.

## Materials and Methods

### Data Collection

We collected two types of time series data; one is the time series data of a set of keywords contained in Twitter and the other is the time series data of the same set of keywords issued as Google queries. The data were crawled over an 11-month period using Google Trends [7] and Twitter API (Japanese tweets only) from July 16, 2011 to May 13, 2012, which is 302 days. The set of keywords was chosen by selecting the top 1,000 keywords that appeared in Twitter during this period. Google Trends only provides the volume of how many queries are issued on a daily basis, thus the time series data for Google is an aggregation of the popularity of a particular keyword that day. As for Twitter, data are available on a much finer timescale; thus, we prepared two types of time series, one in which popularity was aggregated per day and the other in which popularity was aggregated per hour. The one-day unit time series was used to compute TE between Google and Twitter, and the one-hour unit time series was used to compute TE within Twitter.

### Bursts

We define a bursting behavior as “a keyword's popularity that shows a sudden increase.” This was observed in the time series of Twitter keywords and Google queries. For example, the keyword “earthquake” bursts every time there is an earthquake. Since the most salient property of the time series is bursting behavior, counting the number of bursts is a first step toward characterizing the reactive or default modes of the time series.

A state-of-the-art burst detection method determines the local maximum of the *peaks* (e.g., log derivatives [8]). However, our Twitter dataset analysis revealed that the most dominant distributions among the 1,000 most-frequent keywords were those with log-normal distributions. Therefore, to more accurately detect the bursts in our dataset, we first determined the burst

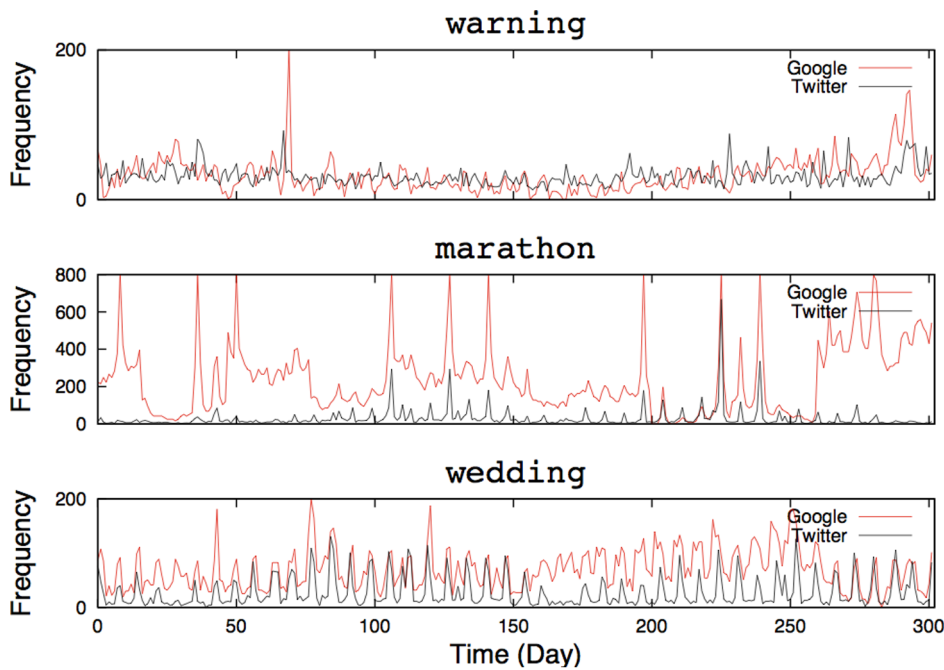

**Figure 2. Examples of infrequent keywords in Google queries and Twitter keywords.** Burst behaviors were clearly detected and synchronization between the two time series was often salient.  
doi:10.1371/journal.pone.0060398.g002

region, using the standard deviation ( $\sigma$ ) and the mean value ( $\mu$ ) of the logarithm of popularity; second, we defined the burst region, where popularity first goes above  $\sigma + \mu$  and then goes below this value; and third, we extracted the maximum popularity within the region as a peak. More precisely,  $\mu$  and  $\sigma$  were defined as

$$\mu = \Sigma \log x / T,$$

$$\sigma = [\Sigma (\log x - \mu)^2] / T - \mu^2,$$

where  $T$  denotes the total number of points in the time series, which is determined by the time resolution (i.e.,  $302/\Delta t$ ). If the successive bursting time points were less than or equal to 1, we do not consider this as a bursting period. In this paper, we take these peaks as the definition of “bursts.”

Time resolution is another complex factor to be considered. Bursts of each keyword vary with different time resolutions. For example, the keyword “good night” has 24-hour periodicity and in order to detect this periodic burst, a one-hour time resolution is adequate. If the time resolution is shorter than one hour, too many bursts are detected. In order to suppress periodic bursts in the time series, we should choose the adequate time resolution for each keyword, but there is no universal time resolution that is applicable to any keyword. We will come back to this point in subsequent sections.

The effects of tweets generated by bots also need to be considered. It is known that 51% of traffic on average Web sites is potentially generated by bots [9]. Bots tend to post a large number of tweets that include the same keyword in a very short time period. We can mitigate the effects of bots by removing bots that post an extreme number of tweets, say, in a few seconds [10]; however, obviously, it is not possible to remove all the bots. In fact, these indistinguishable bots can be considered as an essential part

of the Web, which function to maintain overall activity that may also induce human actions. Overall, these various temporal scales organize a background temporal structure in Twitter’s time series and, together with sudden bursting behavior and autonomous bot tweets, act to form the Web’s temporal dynamics.

### Information Flow

The information transfer observed in Twitter keywords and Google queries is computed on the basis of TE, which was developed by Schreiber [4], Staniek and Lehnitz [11,12], and Bertschinger [13]. TE is one of the information entropy measurements for estimating how the uncertainty of a time series is reduced by using either its preceding states or other time series. In this sense, TE is similar to Granger causality [14–16], which calculates the degree to which one time series drives another. However, TE has advantages over Granger causality, since TE can eliminate the false contribution from the common temporal pattern that is present in both time series when comparing two temporal time series. For this same reason, TE has an advantage over mutual information. On the other hand, TE cannot measure the causal effect but can provide a predictive measure, as discussed recently in [5,6].

Suppose the TE between two different temporal time series is associated with the keywords  $i$  and  $j$ , respectively. If the TE from  $i$  to  $j$  is greater than that from  $j$  to  $i$ , it can be said that knowing the temporal sequence of  $i$  decreases the uncertainty of  $j$  compared with the opposite case. Differing from mutual information, TE has the advantage of being able to ascertain the direction of information flow, rather than mere temporal correlation. Practically speaking, it is generally difficult to measure the causal effect without knowing the underlying equation and, since Granger causality calculates the linear approximation, it is not adequate for highly nonlinear systems, which is the case with our datasets. For these reasons, we use TE in our study.

For example, according to [4], an advantage of TE is that it can be used to evaluate the causes of epilepsy in the brain using EEG sequences [11]. Another example is comparing heartbeat and breathing sequences to evaluate which affects the other's dynamics [4]. Recently, TE has been used to successfully reveal the underlying network of information transfer in the popularity of hashtags in Twitter [17]. By using the computationally feasible quantity called permutation entropy, TE differentiates between upstream and downstream information flow in a realistic time series with a large, dynamic range of values. That is, the TE of the given pair of time series can be computed in two steps. The first step is to compute the permutation entropy of the  $m$  number of the possible ways of labeling local temporal patterns. The second step is to compute TE on the permuted time series.

### Transfer Entropy (TE)

Shannon entropy, with the probability distribution of  $p(x)$ , is commonly defined in the following manner (where  $x$  is an extracted state of a target system; e.g., time sequence  $X$ ):

$$H(X) = -\sum_{x \in X} p(x) \log_2 p(x).$$

Using this notation, we define mutual information (MI) between two time series  $X$  and  $Y$  in the following manner:

$$MI(X, Y) = H(Y) - H(Y|X),$$

where  $H(Y)$  is the uncertainty of  $Y$  and  $H(Y|X)$  is the uncertainty of  $Y$  for knowing  $X$ . By definition,  $MI(X, Y) = MI(Y, X)$ , so that no causal relationship is detected with MI. By introducing the time delay, we can improve the situation, although it remains difficult to capture the direction of causality.

On the other hand, TE from  $X$  to  $Y$ , which is denoted as  $TE(X \rightarrow Y)$ , is defined by

$$TE(X \rightarrow Y) = H(Y_{t+s}|Y_t^{(d')}) - H(Y_{t+s}|Y_t^{(d')}, X_t^{(d)}),$$

where  $H(X|Y)$  denotes the conditional entropy and  $X_t^{(d)}$  and  $Y_t^{(d')}$  denote the past history of  $d$  and  $d'$  length counted from the present time (i.e.,  $x_t, x_{t-1}, \dots, x_{t-d}$  or  $y_t, y_{t-1}, \dots, y_{t-d'}$ ), respectively. Here, we also considered the time delay effect  $s$  and the different time length of the past  $X$  and  $Y$ , (i.e.,  $d$  and  $d'$ ), respectively. TE measures the decrease of uncertainty in the state  $y_{t+s}$  by knowing the uncertainty of  $x_t^{(d)}$  from the past history of other variables such as  $x$ . If there is no information flow from  $X$  to  $Y$ ,  $TE(X \rightarrow Y)$  disappears but  $TE(Y \rightarrow X)$  does not, as the TE is explicitly non-symmetric with respect to  $Y$  and  $X$ .

Let us express the formulas in a more explicit manner by using the probabilities of each element of the time series, such that

$$TE(X \rightarrow Y) = -\sum_{y_{t+s}, y_t \in Y} \sum_{x_t \in X} p(y_{t+s}, x_t, y_t) \log \frac{p(y_{t+s}|x_t^{(d)}, y_t^{(d')})}{p(y_{t+s}|y_t^{(d')})}.$$

Here,  $p(x|y)$  denotes conditional probability. The opposite TE is obtained in the same manner; for example,

$$TE(Y \rightarrow X) = -\sum_{x_{t+s}, x_t \in X} \sum_{y_t \in Y} p(x_{t+s}, x_t, y_t) \log \frac{p(x_{t+s}|x_t^{(d)}, y_t^{(d')})}{p(x_{t+s}|x_t^{(d)})}.$$

Then, we measured the direction of the information flow by comparing the TE for the pair of time series. In particular, we use the difference between  $TE(X \rightarrow Y)$  and  $TE(Y \rightarrow X)$  as the quantity of information flow denoted by  $TE(X, Y) = TE(X \rightarrow Y) - TE(Y \rightarrow X)$  in the remainder of this paper. In order to calculate TE practically, we should discretize the continuous state flow. Because of the trends in the time series, it is difficult to discretize the state by its absolute value. Thus, we used permutation entropy as explained below to have a stable measurement.

### Permutation Entropy and Time Resolution

Bandt and Pompe [18] introduced a simple refinement of entropy with sequences that are practical and that allow feasible coding of the real-value dataset. This method is based on the re-ordering of the amplitude values of the time series  $X_t = \{x_t\}$  and  $Y_t = \{y_t\}$ , so that the amplitudes are arranged in ascending order. Namely,  $X_n^{(m)} = (x_n, x_{n-1}, x_{n-2}, \dots, x_{n-m+1})$  are arranged in ascending order and become  $(x_l, x_{l+1}, \dots, x_{l+m-1})$  such that  $(x_l \geq x_{l+1} \geq x_{l+2}, \dots, \geq x_{l+m-1})$ . We now use the indexes of these variables instead of their amplitudes; for example,  $(x_1, x_2, x_3, x_4)$  is re-ordered as  $(x_4, x_2, x_1, x_3)$ , so that  $(x_4 \geq x_2 \geq x_1 \geq x_3)$  and the new temporal sequence is  $(4, 2, 1, 3)$ . In this example,  $m$  is set to 4, which generates a total of 24 patterns ( $4! = 24$ ). By shifting a window, we assign a number to each local time series of the length  $m$ . In this manner, any time series can be mapped onto a string of finite symbols, thereby allowing us to estimate the probabilities needed to compute the TE. Yet, choosing a large  $m$  could use a large amount of computation time and resources. This is because the probabilities of the triplet  $P(x, x', y)$  is defined on the large number of combinations; therefore, we need the same order of sampling points. In the case of both Twitter and Google,  $m$  is not well estimated; thus, we had to conduct an elaborate search on the time series of both Twitter and Google by changing the dimensionality  $m$ .

Using permutation entropy, we compute the TE of a given time series  $T_0$  in the following manner:

1. Generate a time series  $T_1$  of the length  $l_1$  by aggregating the state  $x_0(t)$  (i.e., the sum of tweets between  $t$  and  $t + \Delta t$ ) for each time steps of the original time series  $T_0$  of length  $l_0$ . The length  $l_1$  now becomes  $l_0/\Delta t$  and the state now becomes  $x_1(n)$ , where  $n$  ranges from 1 to  $l_0/\Delta t$  as follows,

$$x_1(n) = \int_{(n-1)\Delta t}^{n\Delta t} x_0(s) ds.$$

2. Redefine the time series  $T_1$  as  $T_2$  which is obtained by permuting  $T_1$  for each  $m$  time window. By shifting the time window individually, we obtain the length  $l_2 = l_1 - m$  and the number of possible symbols is  $m!$ .
3. Compute the TE on  $T_2$  with the parameters  $d, d'$ , and  $s$ . It should be remarked that  $d = 1$  corresponds to  $m$  time steps in  $T_1$ , which thus correspond to  $m \times \Delta t$  time steps in the original sequence  $T_0$ .

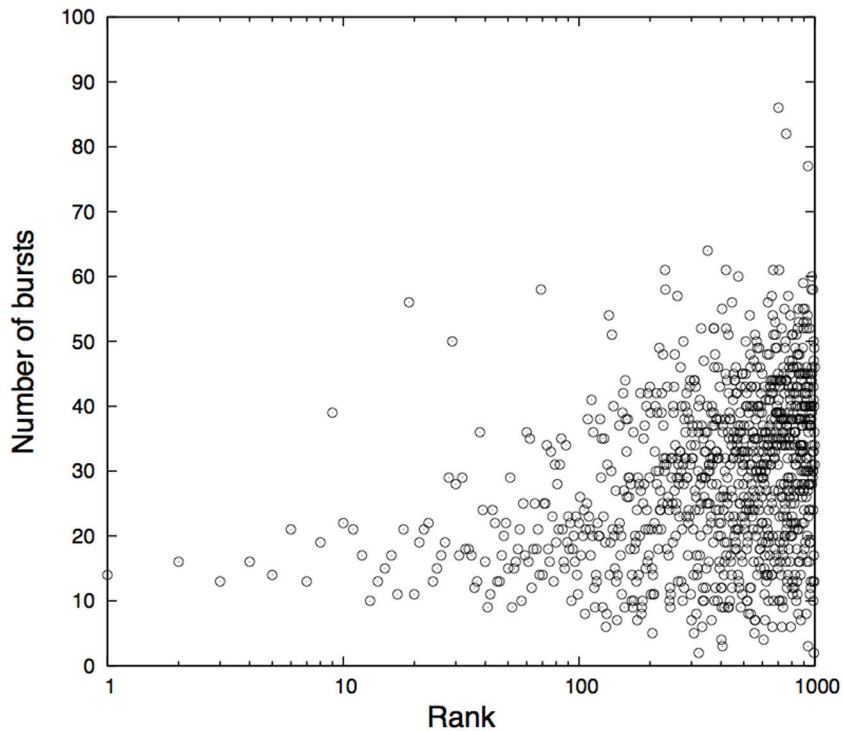

**Figure 3. Relationship between the number of bursts and keyword frequency rankings.** There was a tendency for less-frequent keywords to have a greater number of bursts and the fewer number of bursts were detected with frequent keywords.  
doi:10.1371/journal.pone.0060398.g003

In all, we have five parameters ( $d, d', s, m$ , and  $\Delta t$ ) to compute the TE from the original time series. We set  $d = d' = 1$  and  $s = 1$ , and utilize  $m$  and  $\Delta t$  as major controlling parameters. This is based on our understanding that changing  $d, d'$ , and  $s$  is not adequate because the values that must be chosen are also highly

dependent on which  $\Delta t$  is chosen. In other words, changing  $\Delta t$  and  $m$  can also account for changing parameters  $d, d'$ , and  $s$ . Therefore, it is preferable to fix the parameters  $d = d' = s = 1$  and vary the other two parameters,  $\Delta t$  and  $m$ . The optimal  $\Delta t$  and  $m$  must be different for each time series; however, it is pragmatically

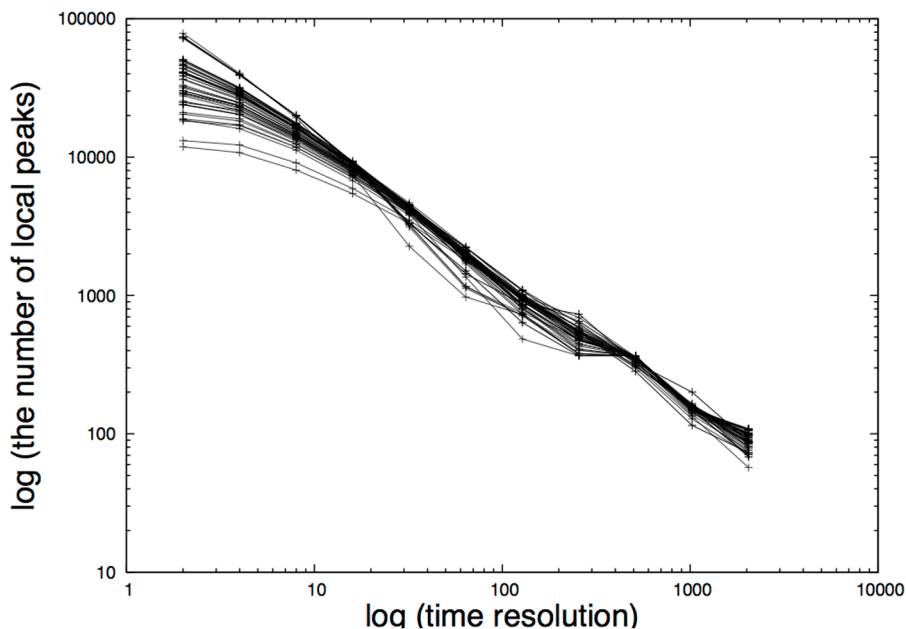

**Figure 4. Relationship between the number of local peaks and time resolution  $\Delta t$  in log scales.** Data computed from 46 keywords are superimposed in the figure, showing that the number of local peaks obeys a power-law of up to around  $2^9 (= 512)$  minutes.  
doi:10.1371/journal.pone.0060398.g004



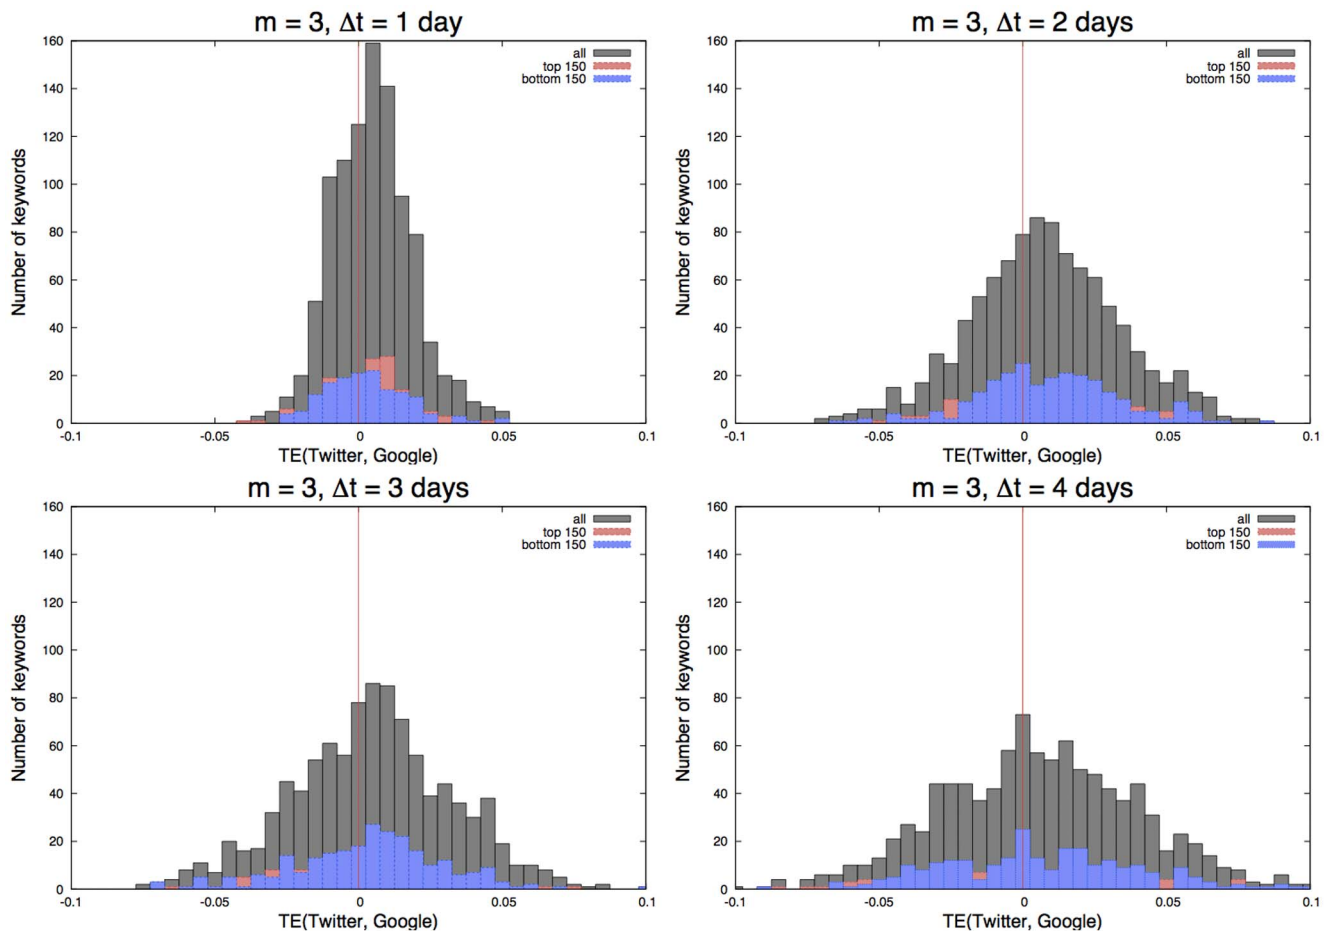

**Figure 5. The  $TE(Twitter, Google)$  histogram for all the 1,000 keywords, and the top and bottom 150 keywords, by changing  $\Delta t$  from one to four days.** It was found that the information has the tendency to flow from Twitter to Google. For example, 692 keywords show that information is transferred from Twitter to Google (where  $TE(Twitter, Google) > 0$ ) and 308 keywords show that the information is transferred from Google to Twitter (where  $TE(Twitter, Google) < 0$ ) in the case of  $\Delta t$  equals to one day.  
doi:10.1371/journal.pone.0060398.g005

difficult to select different  $\Delta t$  for each sequence. It may not be the best method, but we adopt our parameters empirically using the following principles: 1) For computing TE between Google and Twitter, we checked  $m=2, 3$ , and 4 and adopted  $m=3$ . We did not use  $m=2$  as it does not take advantage of using the re-ordering, nor  $m=4$  because if  $m$  is greater than 4, it becomes too large for the number of sampling points we have for the Google time series. We changed  $\Delta t$  for testing how it changes the TE distribution, as will be evident in the results section. 2) For computing the TE inter-Twitter time series, we adopted  $m=3$  for the same reason. Since we have a relatively larger data set for the Twitter time series, we changed  $\Delta t$  over different time resolutions from  $2^0$  minute to  $2^{10}$  minutes to see how the change in  $\Delta t$  affects the results of the TE. Then, we selected one fixed value for  $\Delta t$  to argue the TE flow within Twitter's TE network.

## Results

The inherent patterns and dynamics of Google's and Twitter's time series were investigated to define and characterize the Web's reactive and default modes, using the top 1,000 most-frequent keywords found on Twitter. For example, the top 10 most-frequent keywords were "today," "thing," "people," "RT," "this day," "laughter," "now," "best," "I," and "tomorrow." In the

subsequent subsections, we show the relation between the number of bursts and the frequency ranking of keywords as well as the results of TEs that quantify inherent patterns and dynamics.

## Dynamics of Frequent and Infrequent Keywords

Figure 1 shows the temporal dynamics of some of the most-frequent keywords, such as "people" (ranked 3rd), "now" (ranked 7th), and "I" (ranked 9th). These frequent keywords form the daily life dynamics of Twitter. Interestingly, we rarely observe bursting behaviors in frequent keywords. Rather, more periodic behaviors are observed because these keywords reflect people's repetitive habits, such as tweeting more frequently during the day and less at night. This apparent periodic rhythm becomes explicit in frequently used keywords. On the other hand, Figure 2 presents examples of infrequent keywords, such as "warning" (ranked 862nd), "marathon" (ranked 930th), and "wedding" (ranked 983rd). Interestingly, these infrequent keywords show synchronization between Google's and Twitter's time series and reveal more bursting dynamics with sudden aperiodic spikes.

## Frequency of Keywords and Number of Bursts

Figure 3 depicts the relationship between the number of bursts, defined as a sudden increased popularity, and the keyword frequency ranking. As this figure shows, frequent keywords tend to

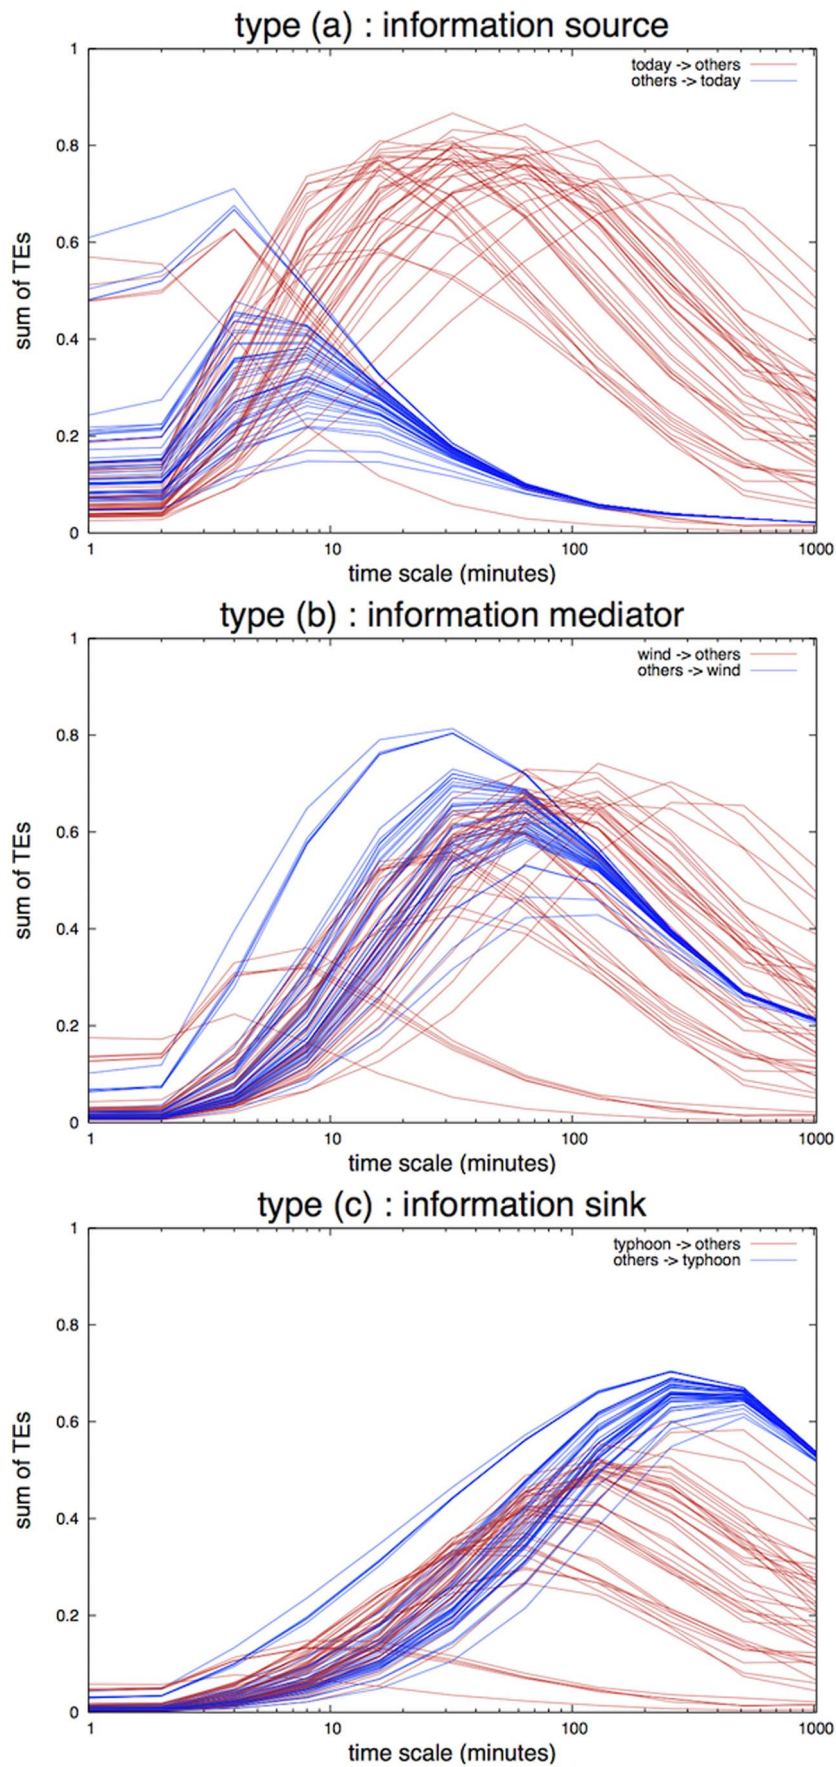

**Figure 6. Integrated TE of a given keyword to/from the other 46 keywords by varying the time resolution  $\Delta t$  from  $2^0 (=1)$  minute to  $2^{10} (=1024)$  minutes.** Type a) a keyword (e.g., “today” ranked 1st) acts as an information source, type b) a keyword (e.g., “wind” ranked 256th) acts as an information mediator, and type c) a keyword (e.g., “typhoon” ranked 551st) acts as an information sink.  
doi:10.1371/journal.pone.0060398.g006

have almost no bursts and infrequent keywords have more bursts. Infrequent keywords such as “warning” or “marathon,” are rarely tweeted in everyday life, but they may be triggered by real-world events that impact numerous people. We say that these infrequent keywords constitute the Web’s reactive mode toward real-world events. On the other hand, frequently used keywords constitute the Web’s baseline activity without being activated externally. Namely, these keywords rarely respond to particular events, but continue to fluctuate by themselves. The reactive mode is sustained by external causes and the Web’s baseline activity is maintained intrinsically. We call this baseline activity the default mode.

In the following sections, we show that transfer information can characterize the time series of frequent or infrequent keywords and discuss the Web’s reactive and default modes in greater detail.

### Determining the Time Resolution $\Delta t$

We are free to choose a base duration for each time series  $\Delta t$ , thus, we investigated how the change in  $\Delta t$  differs in the resulting time series. More specifically, we aggregated tweets from  $2^0$  minute to  $2^{10}$  minutes and simply counted the number of local peaks (i.e.,  $x_{n-1} \leq x_n \leq x_{n+1}$ ). The analysis was conducted on a set of 46 keywords that were randomly chosen from 1,000 keywords. The results are presented in Figure 4. It is evident from the figure that the number of peaks approximately obeys the power-law with an exponent of around  $-1$  for  $\Delta t = 2^0$  to  $2^9$  irrespective of

keywords. After  $2^9$  minutes, the individual difference in keywords gradually became apparent. It is evident that these two features correspond to the micro and macro time scales of Twitter, respectively. In the micro time scale in the order of minutes to an hour, it reflects each user’s online tweeting action. In the macro time scale in the order of hours to a day, it reflects the mood of a society, that is, what people care about and what people are anticipating.

In computing the entropy transfer between Google and Twitter, we examine the macro time scale domain because Google only supplied a one day dataset and we are only concerned with how information is circulated at a societal level. On the other hand, in computing the entropy transfer of inter-Twitter time series, we examine the micro time scale because we are concerned with the action pattern of users. Namely, each Twitter user is basically concerned about what appears on his/her timelines and that should be part of the micro time scale.

### Information Transfer between Twitter and Google

In order to investigate the Web’s reactive and default modes, we computed the TE between Twitter and Google for each keyword. As discussed above, we used the time resolution of one day as a base unit and the window size was set to 302 steps (which corresponds to 302 days) in order to satisfy the required sampling points (i.e., 216 points for  $m=3$ ). We increased the time resolution

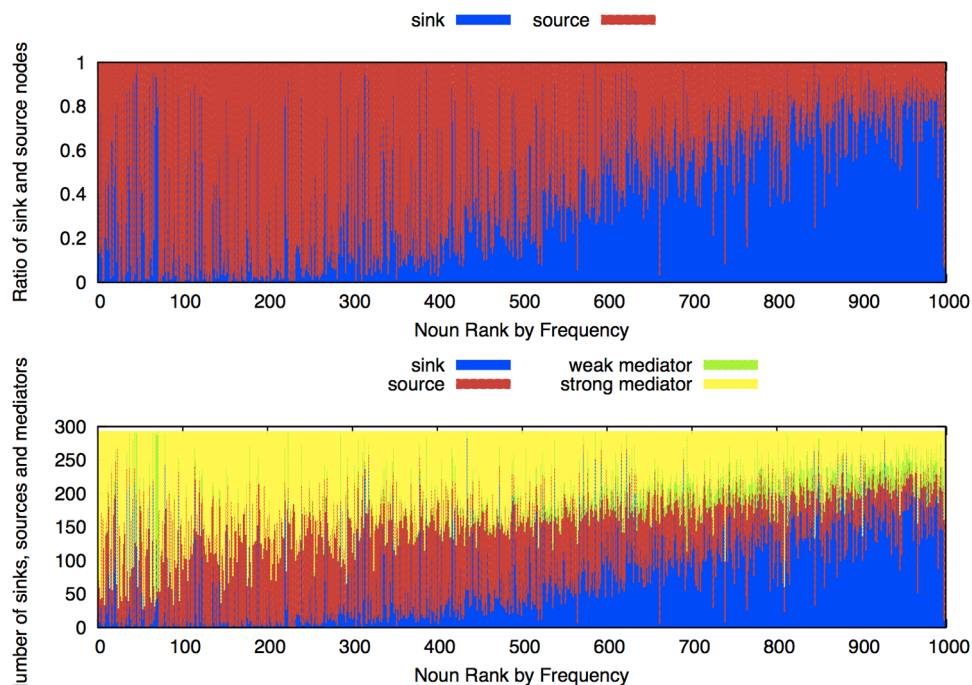

**Figure 7. The role of each keyword.** (Top) The ratio of keywords becoming sources and sinks shown as a function of keyword frequency over time. Red shows the source ratio and blue shows the sink ratio, as a function of keyword frequency over time. The frequent keywords tend to become source nodes and infrequent keywords tend to become sink nodes. (Bottom) Strong mediators are defined as having ample incoming and outgoing TE flow and weak mediators are defined as those with both weak incoming and outgoing TE flow. The number of strong and weak mediators is incorporated with the number of sinks and sources for each keyword.  
doi:10.1371/journal.pone.0060398.g007



$\Delta t$  from one day to four days to see how it affects the entropy transfer.

Figure 5 shows the TE(Twitter, Google) for 1,000 keywords for  $m=3$  and  $\Delta t=2,3,4$  days with their plotted distribution, respectively. Further, the distribution of the top 150 and the bottom 150 most-frequent keywords is superimposed. If the TE is positive, it implies that the information transfer is from Twitter to Google, otherwise it is from Google to Twitter. It is suggested from this figure that information is transferred more from Twitter to Google than from Google to Twitter as a whole. Indeed, when examining the TE for individual keywords when  $m=3$  and  $\Delta t=60$  minutes, the total of 692 keywords (out of 1,000) shows that information is transferred from Twitter to Google and 308 that it is transferred from Google to Twitter.

When comparing the top 150 frequent and bottom 150 keywords, we see a weak trend indicating that the top 150 keywords transfer from Twitter to Google more than the bottom 150 do. This suggests that the Web's default mode (or frequent keywords with rare bursting behaviors) contributes to reducing uncertainty in the information circulation on the Web more than the Web's reactive mode (or infrequent keywords with many bursts).

Next, we measured the information transfer among Twitter keywords and discovered an inherent network behind the keyword network connected through TE. Based on their information transfer, we call this network among keywords the transfer entropy network (TE network); we examine this in the next section.

### Information Transfer on Twitter

Before computing the TEs of all the pairs of 1,000 keywords in Twitter, we used the same 46 keywords as those in the section entitled **Determining the Time Resolution  $\Delta t$**  and computed the TEs of all the pairs in this set of keywords by changing the time resolution  $2^n$  ( $n=1,2,3,\dots,10$ ) minutes to see how they affect the TEs.

We distinguished the results into three TE types as shown in Figure 6. The first one is *type a* whereby the TE from this keyword to other keywords is smaller than the TEs from other keywords to this keyword in the smaller  $\Delta t$ , and the tendency is reversed in the larger  $\Delta t$ . For example, the TE from other keywords to this keyword has the maximum TE value of around  $2^2$  minutes and

the TEs from this keyword to other ones have a maximum value of approximately  $2^6$  minutes (or approximately one hour). That is, if  $\Delta t$  is larger than one hour, the direction of the TE flow is always from this keyword to other keywords. The second one is *type b*, whereby the TE from this keyword overlaps with the TEs from other keywords to this keyword. That is, there is no stationary TE flow direction between this keyword and other keywords. Finally, the third is *type c* whereby the TE from this keyword to other keywords is larger than the TEs from other keywords to this keyword in the smaller  $\Delta t$ , and the tendency is reversed in the larger  $\Delta t$ .

From this observation and judging from the direction of the TE flows, we identify *type a* as an information source to other keywords, *type b* as an information mediator, and *type c* as an information sink to other keywords. While many keywords act as *type b* for most of the time resolutions, interestingly, the higher-ranking keywords tend to play as *type a*, the information source, and the lower-ranking keywords tend to play as *type c*, the information sink. As evident from these figures in Figure 6, the effective  $\Delta t$  that maximizes the TE is different for each keyword. For the purpose of comparison, we used the time resolution  $\Delta t$  of one hour to compute the TE.

Finally, we investigated how each keyword plays a role as source, sink, or mediator for the 1,000 keywords. We computed the sum of all incoming flow ( $TE^{in}$ ) and all outgoing flow ( $TE^{out}$ ) for each keyword. If  $TE^{out} - TE^{in}$  is greater than a given threshold, we say that the keyword plays the role of the information *source* for other keywords. Similarly, if  $TE^{in} - TE^{out}$  is greater than the threshold, we say it plays the role of the information *sink* to other keywords. This corresponds to *type a* and *type c*, respectively. We can further distinguish keywords that are neither source nor sink. If both  $TE^{in}$  and  $TE^{out}$  are smaller than the threshold, we refer to this keyword as a *weak mediator*. On the other hand, if both  $TE^{in}$  and  $TE^{out}$  are greater than the threshold, we refer to this keyword as a *strong mediator*. These mediator nodes do not become either sink or source but act as “relay” nodes to send and receive information to other keywords.

The result of the computations for the 1,000 keywords is depicted in Figure 7. The TE was created from the 240-hour time window for over 302 days. We characterize each keyword by labeling it as source, sink, weak mediator, or strong mediator. We

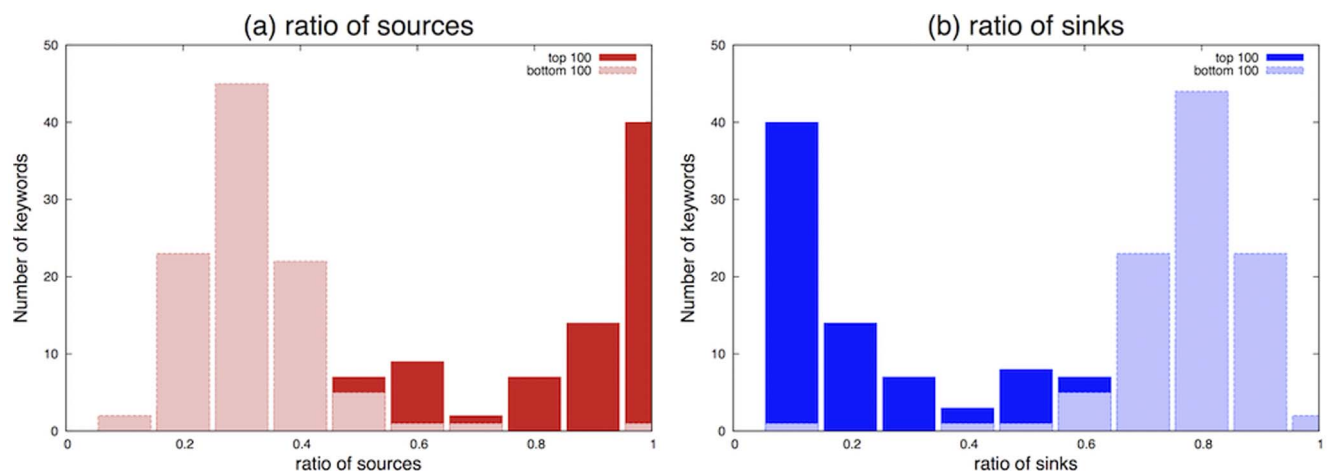

**Figure 8. A histogram of the ratios for each keyword that becomes sources a) and sinks b) computed from the top 100 and bottom 100 keywords.** The top 100 keywords have a higher ratio of becoming sources compared to the bottom 100 keywords, whereas the bottom 100 keywords have a higher ratio of becoming sinks compared to the top 100 keywords.  
doi:10.1371/journal.pone.0060398.g008

**Table 1.** The top 10 source and sink keywords from among 1000 keywords.

| Rank | source keywords | Rank | sink keywords |
|------|-----------------|------|---------------|
| 767  | lunch           | 779  | RJTY          |
| 567  | lunchtime       | 526  | game          |
| 59   | thing           | 38   | mm            |
| 48   | direction       | 574  | where         |
| 9    | I               | 619  | map           |
| 63   | long time       | 316  | Nihonbashi    |
| 49   | eye             | 625  | play          |
| 76   | everyone        | 437  | average       |
| 7    | now             | 226  | JST           |
| 100  | for             | 44   | wind          |

doi:10.1371/journal.pone.0060398.t001

used the threshold however, of course, these labels, either source or sink, are not fixed but temporally changing as with the advent of time. If keywords are purely uncorrelated, the rate of becoming sink or source must be flat against the keyword rank order. Instead, Figure 7-(top) shows that frequent keywords have a higher tendency to become source nodes when compared to less-frequent keywords.

To investigate this characteristic further, the top 100 and bottom 100 keywords were investigated to determine their tendencies to become source or sink. Figure 8 shows that the top 100 keywords tend to become an information source, whereas the bottom 100 keywords have the opposite tendency; i.e., they tend to become an information sink. Table 1 shows the top 10 most-frequent source keywords and the top 10 most-frequent sink keywords out of 1,000 keywords. We see that pronouns such as “I” or “everybody,” and ordinary nouns that are used in everyday situations such as “lunch” or “thing,” become source nodes. More generic keywords, such as “game” or “play,” and some specific words, such as “JST (Japan Science and Technology Agency)” or “Nihonbashi” (a district in Tokyo), become sink nodes. Figure 7-(bottom) shows the actual number of source, sink, and mediator nodes for all the windows. As we see in the figure, frequent keywords tend to become source nodes from the perspective of the sink/source ratio, but they also tend to become relay nodes.

We argue that these Twitter time series are not independent of each other. When a keyword is an information *source*, knowing the time series of the keyword tends to reduce the uncertainty of the other keywords. When a keyword is an information *sink*, knowing the time series of the other keywords can reduce the uncertainty of that keyword. In brief, our contention is that frequent keywords have a strong tendency to become source nodes and infrequent ones to become sink nodes. Since frequent keywords are less driven by the real world because they have fewer bursts, we conclude that frequent keywords are mainly activated by their inherent dynamics (e.g., weak correlation through timelines) and that they form the default mode of the Web. Frequent keywords as an information source means they can reduce uncertainty in the time series of infrequent keywords. The default mode can be an important Web mode, not only for supporting baseline activity but also for reducing uncertainty in information circulation on the Web, thereby regulating the consistency of information between the Web and the real world. This is consistent with the roles of frequent keywords of Twitter as discussed in relation to the TEs between Twitter and Google.

## Discussion

This paper explored how to define the Web’s reactive and default modes by information transfer by computing TE to characterize the inherent structure of the Web dynamics. First, we defined whether a keyword is in default or reactive mode in terms of how burst events are caused internally or externally. There are reports on YouTube page views and Twitter hashtags, whereby internally and externally caused bursts are distinguished by certain criteria [17,19]. Our analysis of the number of bursts in relation to keyword frequency revealed that while low-frequency keywords tend to burst more, keywords are more influenced by real-world events, when compared to high-frequency keywords.

From this observation, we defined that high-frequency keywords form the Web’s default mode network and low-frequency keywords constitute the Web’s reactive mode. When analyzing the information transfer between Google and Twitter, we found that information is mostly transferred from Twitter to Google and that this tendency is more apparent for high-frequency keywords than for low-frequency keywords. We also studied the information flow network formed among Twitter keywords by taking the keywords as nodes and flow direction as the edges of a network. We found that high-frequency keywords tend to become information sources and low-frequency keywords tend to become information sinks. These findings suggest that we can use high-frequency keywords (or default mode of the Web) to reduce uncertainty with the externally driven low-frequency keywords (or reactive mode of the Web). However, it is fair to assume that frequently searched keywords in Google are different from the frequent keywords found on Twitter. Thus, if we investigated the high-frequency keywords found in Google queries, the results may be different.

The concept of reactive and default modes originates from brain science [20–22]. A brain region responsible for a given task is identified by measuring the neural activity that is observably higher compared to the baseline activity. Raichle et al. [23] examined the baseline activity by analyzing the regions that become less active when a specific task is given. This successful approach uncovered some remarkable perspectives and characteristics of the default mode; based on Buckner’s [22] and Raichle’s [24] reviews, these are: i) the area associated with the default mode is found as the integration of various subsystems in the brain - the medial prefrontal cortex and posterior cingulate cortex subsystems seem to play central roles. ii) The neural activity of the aforementioned subsystems were observed as noisy fMRI signals at a low frequency of about 0.1 Hz or less, showing global synchronization. iii) The default mode is to do with spontaneous cognition e.g., day dreaming and internal thoughts such as future planning. iv) The activity of the default mode is anti-correlated with the other brain regions that are responsible for focusing attention on the external world; and v) the brain region associated with the default mode overlaps with those involved in the construction of episodic memory.

This notion of the default mode can be generalized for any living systems with or without brain systems. In the case of the Web system, it can be said that 1) frequent keywords constitute the default mode (mostly everyday keywords), 2) these frequent keywords display less frequent bursting behaviors and are an information source for other keywords, 3) the default mode may help reduce uncertainty in the entire Web system, and 4) the default mode comprises quasi-periodic time series. From this comparison with the default mode network in brain systems, and in particular with the possibility that high-frequency keywords may help to predict essentially unpredictable events, it becomes apparent the Web’s default mode may have the same property

as the default modes in the brain. Differentiating between these two modes, the reactive and the default, provides a useful perspective for understanding Web dynamics and predicting the future of bursting behavior in the time series of keyword frequencies in tweets in Twitter, as well as in the time series of search queries in Google. With respect to the examples of complex networks in general, we believe that the default mode is key for understanding autonomy in complex systems in general. Any autonomous system (e.g., robots) possesses primitive forms of the default mode with different time scales [25].

Determining the adequate time resolution in a time series is generally a difficult problem, particularly when we compute TE. In Twitter time series, tweets are basically created out of individual users' postings with no simple threshold or global knowledge of who is posting. With the apparent 24-hour periodicity that we see in keywords like "good night," it is rather appropriate to use a one-hour resolution to analyze information transfer and correlation. On the other hand, the keyword "Christmas" has a one-year periodicity and keywords like "earthquake" have no characteristic time resolutions. However, when we examine the time resolutions of the order of a few minutes to a few hours, these time series are similar.

In the section entitled **Determining the Time Resolution**  $\Delta t$ , we varied the time resolution of each time series and computed the information transfer to ascertain how the TE changes as a function of the time resolution. The TE between Google and Twitter is relatively robust against the change of  $\Delta t$ . Moreover, with regard to TE among different Twitter keywords, the maximum value of outgoing TE is found around one hour for many keywords, but there are exceptions. Due to the limitation of data availability and computational power, we chose one day as

the time unit for calculating TE between Twitter and Google, and one hour as the time unit for keywords within Twitter.

We may have to adopt different time resolutions for different keywords. Namely, some keywords provide more information within a smaller time resolution but some provide information in much longer time resolutions. As a result, the total uncertainty of Twitter is distributed over different time resolutions. Which time resolution is important for a keyword is determined by the dynamics of other keywords. For example, studies on nonlinear phase coupling systems show that faster phase oscillation generally entrains the slower one. Here, the situation becomes more complicated since the system is always perturbed by periodic or aperiodic open flow in the real-world. Moreover, the time scale hierarchy is self-organizing rather than given from the beginning. Google has an additional source of time scales on the Web such as automated crawling programs that change the search results that are running on the Web. The default and reactive modes that we found on the Web are the outcomes of such nested time architectures. The investigation of nested time scales may also be applicable to other complex adaptive systems.

## Acknowledgments

We thank Dr. Yasuhiro Hashimoto and Eiko Matsuda for their substantial support regarding the data analysis.

## Author Contributions

Conceived and designed the experiments: MO TI. Performed the experiments: MO TI. Analyzed the data: MO TI. Contributed reagents/materials/analysis tools: MO TI. Wrote the paper: MO TI.

## References

- IBM. Bringing big data to the enterprise. Available: <http://www-01.ibm.com/software/data/bigdata/>. Accessed 2013 March 21.
- Kwak H, Lee C, Park H, Moon S (2010) What is twitter, a social network or a news media? In: Proc. of the 19th International World Wide Web. 591–600.
- Granovetter MS (1973) The strength of weak ties. *American Journal of Sociology* 78: 1360–1380.
- Schreiber T (2000) Measuring information transfer. *Phys Rev Lett* 85: 461–464.
- Lizier JT, Prokopenko M (2010) Differentiating information transfer and causal effect. *European Physical Journal B* 73: 605–615.
- Chicharro D, Ledberg A (2012) When two become one: The limits of causality analysis of brain dynamics. *PLoS ONE* 7: e32466.
- Google. Google trends. Available: <http://www.google.com/trends/>. Accessed 2013 March 21.
- Rybski D, Buldyrev SV, Havlin S, Liljeros F, Makse HA (2009) Scaling laws of human interaction activity. *J Proc Natl Acad Sci* 106: 12640–12645.
- Rosenberg D. Bots dominate small web site traffic, research shows. Available: [http://news.cnet.com/8301-1009\\_3-57433611-83/\\\_\\\_\\\_bots-dominate-small-web-site-traffic-research-shows/](http://news.cnet.com/8301-1009_3-57433611-83/\_\_\_bots-dominate-small-web-site-traffic-research-shows/). Accessed 2013 March 21.
- Hashimoto Y, Oka M (2012) Statistics of geo-tagged tweets in urban areas. *Journal of the Japanese Society for Artificial Intelligence* 27(4): 424–431.
- Staniek M, Lehnertz K (2008) Symbolic transfer entropy. *Phys Rev Lett* 100: 158101.
- Lizier JT, Heinzle J, Horstmann A, Haynes JD, Prokopenko M (2010) Multivariate information-theoretic measures reveal directed information structure and task relevant changes in fMRI connectivity. *Journal of Computational Neuroscience* 30: 85–107.
- Bertschinger N, Olbrich E, Ay N, Jost J (2008) Autonomy: An information theoretic perspective. *Biosystems* 91: 331–345.
- Granger CWJ (1969) Investigating causal relations by econometric models and cross-spectral methods. *Econometrica* 37: 424–438.
- Barnett L, Barrett AB, Seth AK (2009) Granger causality and transfer entropy are equivalent for gaussian variables. *Phys Rev Lett* 103: 238701.
- Ay N, Polani D (2008) Information flows in causal networks. *Advances in Complex Systems* 11: 17–41.
- Stegg GV, Galstyan A (2012) Information transfer in social media. In: Proceedings of the 21st international conference on World Wide Web. ACM. 509–518.
- Bandt C, Pompe B (2002) Permutation entropy – a complexity measure for time series. *Phys Rev Lett* 88: 174102.
- Crane R, Sornette D (2008) Robust dynamic classes revealed by measuring the response function of a social system. *PNAS* 105: 15649–15653.
- Raichle ME, Snyder AZ (2007) A default mode of brain function: A brief history of an evolving idea. *NeuroImage* 37(4): 1083–1090.
- Raichle ME, MacLeod AM, Snyder AZ, Powers WJ, Gusnard DA, et al. (2001) Inaugural article: A default mode of brain function. In: Proc. of the National Academy of Sciences. 676–82.
- Buckner RL, Andrews-Hanna JR, Schacter DL (2008) The brain's default network anatomy, function, and relevance to disease. *New York Academy of Sciences* 1124: 1–38.
- Raichle ME, MacLeod AM, Snyder AZ, Powers WJ, Gusnard DA, et al. (2001) Inaugural article: A default mode of brain function. *PNAS* 98: 676–82.
- Fox MD, Raichle ME (2007) Spontaneous fluctuations in brain activity observed with functional magnetic resonance imaging. *Nature Reviews Neuroscience* 8: 700–711.
- Ikegami T (2012) A design for living technology: Experiments with the mind time machine. *Artificial Life*. In press.
